# Supplementary material for: On the Human Thermal Load in Fog
Source: MDPI journal article supplement (doi:10.3390/meteorology3010004), 2024-02-06
Supplement: s1 [file s1]

# Supplementary Material: On the Human Thermal Load in Fog

Erzsébet Kristóf <sup>1,\*</sup>, Ferenc Ács <sup>1</sup>, Annamária Zsakai <sup>2</sup>

<sup>1</sup> Department of Meteorology, ELTE Eötvös Loránd University, H-1117 Budapest, Hungary; acs@staff.elte.hu

<sup>2</sup> Department of Human Anthropology, ELTE Eötvös Loránd University, H-1117 Budapest, Hungary; annamaria.zsakai@ttk.elte.hu

\* Correspondence: ekristof86@staff.elte.hu

**Table S1.** Input and output data.  $Q_0$  is solar radiation constant referring to clear sky conditions and a 1-hour time period, and  $\alpha$  is the corresponding dimensionless constant referring to the same hour. The following human parameters were used for the calculation in case of all fog observations: age: 68 years, weight ( $M_{bo}$ ): 89 kg, body length ( $L_{bo}$ ): 190 cm. The basal metabolic heat flux density ( $M_b$ ) is  $39.45 \text{ W m}^{-2}$ , while the heat flux density referring to walking ( $M_w$ ) is  $94.22 \text{ W m}^{-2}$ .

| Input Data         |            |       |                                                                            |                                     |                                |                                      |                 |                                |                                         |                       |                    | Output Data                                                |                                          |                               |                                                             |                                                           |                                                                            |                                                                          |
|--------------------|------------|-------|----------------------------------------------------------------------------|-------------------------------------|--------------------------------|--------------------------------------|-----------------|--------------------------------|-----------------------------------------|-----------------------|--------------------|------------------------------------------------------------|------------------------------------------|-------------------------------|-------------------------------------------------------------|-----------------------------------------------------------|----------------------------------------------------------------------------|--------------------------------------------------------------------------|
| No. of Observation | Date       | Time  | Solar Radiation Constant ( $Q_0$ ) [MJ m <sup>2</sup> hour <sup>-1</sup> ] | Dimensionless Constant ( $\alpha$ ) | Air Temperature ( $T_a$ ) [°C] | Relative Sunshine Duration ( $rsd$ ) | Cloud Cover (N) | Wind Gust [m s <sup>-1</sup> ] | Average Wind Speed [m s <sup>-1</sup> ] | Relative Humidity [%] | Air Pressure [hPa] | Net Isothermal Radiation ( $R_{ni}$ ) [W m <sup>-2</sup> ] | Solar Radiation (S) [W m <sup>-2</sup> ] | Mean Radiant Temperature [°C] | Operative Temperature for Average Wind ( $T_{o,ave}$ ) [°C] | Operative Temperature for Wind Gust ( $T_{o,gust}$ ) [°C] | Thermal Resistance of the Clothing for Average Wind ( $r_{cl,ave}$ ) [clo] | Thermal Resistance of the Clothing for Wind Gust ( $r_{cl,gust}$ ) [clo] |
| 1                  | 2017.02.15 | 8:15  | 0.892                                                                      | 0.39                                | -3                             | 0                                    | 1               | 2.5                            | 0.8                                     | 100                   | 1039               | 49.4                                                       | 96.6                                     | 7.4                           | 2.4                                                         | 0.8                                                       | 1.58                                                                       | 1.89                                                                     |
| 2                  | 2017.02.20 | 7:36  | 0.452                                                                      | 0.35                                | -0.5                           | 0                                    | 1               | 3.3                            | 2.5                                     | 100                   | 1024               | 10.1                                                       | 43.9                                     | 1.7                           | 0.3                                                         | 0.2                                                       | 1.92                                                                       | 1.96                                                                     |
| 3                  | 2017.10.20 | 9:58  | 1.486                                                                      | 0.39                                | 10.5                           | 0                                    | 1               | 1.4                            | 0.3                                     | 100                   | 1019               | 91.8                                                       | 161                                      | 26.8                          | 21.9                                                        | 18.5                                                      | 0.04                                                                       | 0.51                                                                     |
| 4                  | 2017.11.25 | 9:36  | 1.08                                                                       | 0.31                                | 5                              | 0                                    | 1               | 5.2                            | 3.6                                     | 100                   | 1017               | 44.1                                                       | 93                                       | 13.6                          | 8                                                           | 7.6                                                       | 1.4                                                                        | 1.48                                                                     |
| 5                  | 2019.10.26 | 8:30  | 1.03                                                                       | 0.36                                | 5                              | 0                                    | 1               | 0.1                            | 0.1                                     | 100                   | 1025               | 51.4                                                       | 103                                      | 15                            | 12.8                                                        | 12.8                                                      | 0.51                                                                       | 0.51                                                                     |
| 6                  | 2019.12.07 | 10:00 | 1.369                                                                      | 0.3                                 | 2                              | 0                                    | 1               | 1.9                            | 0.8                                     | 100                   | 1020               | 60.5                                                       | 114.1                                    | 14                            | 8.4                                                         | 7                                                         | 1.14                                                                       | 1.38                                                                     |
| 7                  | 2019.12.08 | 8:35  | 0.829                                                                      | 0.17                                | 2                              | 0                                    | 1               | 1.7                            | 0.8                                     | 100                   | 1020               | 5.8                                                        | 39.1                                     | 3.2                           | 2.6                                                         | 2.5                                                       | 1.55                                                                       | 1.69                                                                     |
| 8                  | 2019.12.09 | 8:50  | 0.829                                                                      | 0.17                                | 3                              | 0                                    | 1               | 2.5                            | 1.4                                     | 100                   | 1011               | 5.5                                                        | 39.1                                     | 4.1                           | 3.5                                                         | 3.4                                                       | 1.58                                                                       | 1.68                                                                     |
| 9                  | 2019.12.16 | 7:50  | 0.293                                                                      | 0.04                                | 1                              | 0                                    | 1               | 0.8                            | 0.1                                     | 100                   | 1021               | -20                                                        | 3.3                                      | 1                             | -2.2                                                        | -1.1                                                      | 1.56                                                                       | 1.82                                                                     |
| 10                 | 2020.01.03 | 10:55 | 1.34                                                                       | 0.43                                | -2                             | 0                                    | 1               | 3                              | 1.7                                     | 99                    | 1031               | 95.4                                                       | 160.1                                    | 17                            | 6.3                                                         | 5                                                         | 1.42                                                                       | 1.62                                                                     |
| 11                 | 2020.01.03 | 15:00 | 0.507                                                                      | 0.38                                | -2                             | 0                                    | 1               | 1.1                            | 0.3                                     | 93                    | 1029               | 17.6                                                       | 53.5                                     | 1.8                           | 0.4                                                         | -0.3                                                      | 1.55                                                                       | 1.82                                                                     |
| 12                 | 2020.01.10 | 7:10  | 0.398                                                                      | 0.39                                | -2                             | 0.2                                  | 0.8             | 4.4                            | 2.2                                     | 96                    | 1023               | -5.3                                                       | 56.6                                     | -1.9                          | -2.4                                                        | -2.3                                                      | 2.1                                                                        | 2.2                                                                      |
| 13                 | 2020.01.13 | 7:50  | 0                                                                          | 0                                   | -3                             | 0                                    | 1               | 1.9                            | 0.6                                     | 99                    | 1030               | -21.1                                                      | 0                                        | -2.9                          | -5.5                                                        | -4.8                                                      | 2.09                                                                       | 2.25                                                                     |
| 14                 | 2020.01.14 | 8:00  | 0.398                                                                      | 0.39                                | -3                             | 0                                    | 1               | 4.7                            | 3.1                                     | 99                    | 1027               | 10.3                                                       | 43.1                                     | -0.7                          | -2.3                                                        | -2.4                                                      | 2.14                                                                       | 2.21                                                                     |
| 15                 | 2020.01.15 | 7:25  | 0.398                                                                      | 0.39                                | -2                             | 0                                    | 1               | 4.2                            | 1.7                                     | 99                    | 1031               | 10                                                         | 43.1                                     | 0.2                           | -1.1                                                        | -1.3                                                      | 1.96                                                                       | 2.12                                                                     |
| 16                 | 2020.01.17 | 7:25  | 0.398                                                                      | 0.39                                | -2                             | 0                                    | 1               | 2.2                            | 1.1                                     | 100                   | 1031               | 10                                                         | 43.1                                     | 0.2                           | -1                                                          | -1.2                                                      | 1.87                                                                       | 2.01                                                                     |
| 17                 | 2020.01.18 | 7:50  | 0.398                                                                      | 0.39                                | -2                             | 0                                    | 1               | 0.6                            | 0.1                                     | 100                   | 1028               | 10                                                         | 43.1                                     | 0.2                           | -0.4                                                        | -0.8                                                      | 1.43                                                                       | 1.75                                                                     |
| 18                 | 2020.01.19 | 7:25  | 0.398                                                                      | 0.39                                | -1                             | 0                                    | 1               | 1.1                            | 0.3                                     | 100                   | 1028               | 9.7                                                        | 43.1                                     | 1.1                           | 0.3                                                         | 0                                                         | 1.55                                                                       | 1.8                                                                      |

|    |            |       |       |      |      |     |     |     |     |     |      |       |       |      |      |      |      |      |
|----|------------|-------|-------|------|------|-----|-----|-----|-----|-----|------|-------|-------|------|------|------|------|------|
| 19 | 2020.01.20 | 7:20  | 0.398 | 0.39 | -0.5 | 0   | 1   | 1.9 | 1.4 | 100 | 1043 | 9.5   | 43.1  | 1.6  | 0.4  | 0.3  | 1.81 | 1.87 |
| 20 | 2020.01.20 | 16:40 | 0.167 | 0.25 | 1    | 0   | 1   | 3.9 | 2.2 | 100 | 1046 | -14   | 11.6  | 1    | -0.1 | 0.1  | 1.92 | 1.99 |
| 21 | 2020.01.21 | 7:20  | 0.398 | 0.39 | -2   | 0   | 1   | 2.8 | 1.7 | 100 | 1046 | 10    | 43.1  | 0.2  | -1.1 | -1.3 | 1.96 | 2.05 |
| 22 | 2020.01.21 | 11:30 | 1.503 | 0.42 | -2   | 0   | 1   | 3.1 | 1.1 | 99  | 1046 | 106.5 | 175.3 | 19   | 8.6  | 5.7  | 1.19 | 1.57 |
| 23 | 2020.01.22 | 8:00  | 0.398 | 0.39 | -5   | 0   | 1   | 1.4 | 0.3 | 97  | 1035 | 11    | 43.1  | -2.5 | -3.5 | -4   | 1.83 | 2.14 |
| 24 | 2020.01.22 | 10:50 | 1.34  | 0.43 | -3   | 0   | 1   | 2.4 | 1.8 | 98  | 1035 | 95.7  | 160.1 | 16.2 | 5.3  | 4.5  | 1.51 | 1.61 |
| 25 | 2020.01.24 | 7:30  | 0.398 | 0.39 | -4   | 0   | 1   | 2.2 | 1.1 | 98  | 1031 | 10.6  | 43.1  | -1.6 | -2.9 | -3.1 | 2.02 | 2.16 |
| 26 | 2020.01.24 | 12:20 | 1.39  | 0.47 | -2   | 0   | 1   | 2.2 | 1.4 | 100 | 1030 | 111   | 181.5 | 19.8 | 8.3  | 7    | 1.25 | 1.42 |
| 27 | 2020.01.25 | 8:40  | 0.938 | 0.42 | -2   | 0   | 1   | 1.7 | 0.3 | 99  | 1027 | 58.4  | 109.4 | 10.1 | 5.9  | 3.1  | 1.15 | 1.66 |
| 28 | 2020.01.25 | 15:45 | 0.507 | 0.38 | -1   | 0   | 1   | 1.4 | 0.3 | 96  | 1025 | 17.3  | 53.5  | 2.7  | 1.3  | 0.6  | 1.48 | 1.8  |
| 29 | 2020.01.26 | 7:30  | 0.398 | 0.39 | -1   | 0   | 1   | 2.5 | 1.7 | 100 | 1024 | 9.7   | 43.1  | 1.1  | -0.2 | -0.3 | 1.89 | 1.96 |
| 30 | 2020.01.26 | 21:10 | 0     | 0    | -0.3 | 0   | 1   | 1.7 | 0.8 | 99  | 1026 | -22   | 0     | -0.3 | -2.7 | -2.2 | 1.93 | 2.03 |
| 31 | 2020.01.28 | 7:00  | 0     | 0    | 0    | 0   | 1   | 3.6 | 2.5 | 100 | 1011 | -22.1 | 0     | 0    | -1.7 | -1.5 | 2.06 | 2.1  |
| 32 | 2020.02.16 | 7:30  | 0.452 | 0.35 | -1   | 0   | 1   | 1.7 | 0.8 | 100 | 1030 | 10.3  | 43.9  | 1.2  | 0.1  | -0.1 | 1.74 | 1.88 |
| 33 | 2020.10.02 | 6:10  | 0.448 | 0.11 | 3.4  | 0   | 1   | 1.5 | 1.1 | 98  | 1019 | -13.2 | 13.7  | 3.3  | 2.1  | 2.2  | 1.64 | 1.68 |
| 34 | 2020.10.23 | 6:10  | 0.448 | 0.11 | 3.4  | 0   | 1   | 1.5 | 1.1 | 98  | 1019 | -13.2 | 13.7  | 3.3  | 2.1  | 2.2  | 1.64 | 1.68 |
| 35 | 2020.10.24 | 6:20  | 0.448 | 0.11 | 5.8  | 0   | 1   | 1.5 | 1.1 | 98  | 1017 | -14   | 13.7  | 5.7  | 4.5  | 4.6  | 1.46 | 1.51 |
| 36 | 2020.11.03 | 6:15  | 0     | 0    | 10   | 0   | 1   | 1.5 | 1.1 | 99  | 1020 | -25.5 | 0     | 9.8  | 7.6  | 7.8  | 1.23 | 1.26 |
| 37 | 2020.11.04 | 6:16  | 0     | 0    | 9    | 0   | 1   | 1.5 | 1.1 | 99  | 1021 | -25.2 | 0     | 8.8  | 6.6  | 6.8  | 1.3  | 1.33 |
| 38 | 2020.11.05 | 6:20  | 0     | 0    | 9.9  | 0   | 1   | 1.5 | 1.1 | 99  | 1030 | -25.5 | 0     | 9.7  | 7.5  | 7.7  | 1.23 | 1.27 |
| 39 | 2020.11.08 | 6:30  | 0     | 0    | 2    | 0   | 1   | 1.5 | 1.1 | 100 | 1028 | -22.8 | 0     | 2    | -0.2 | 0    | 1.81 | 1.84 |
| 40 | 2020.11.09 | 8:50  | 0.682 | 0.29 | 1    | 0   | 1   | 1.5 | 1.1 | 100 | 1029 | 17.7  | 54.9  | 4.7  | 2.7  | 2.6  | 1.6  | 1.66 |
| 41 | 2020.11.11 | 6:30  | 0     | 0    | 4.3  | 0   | 1   | 1.5 | 1.1 | 100 | 1030 | -23.5 | 0     | 4.2  | 2    | 2.2  | 1.64 | 1.68 |
| 42 | 2020.11.19 | 7:30  | 0.389 | 0.18 | 5    | 0   | 1   | 1.5 | 1.1 | 100 | 1029 | -9.6  | 19.5  | 4.9  | 4.1  | 4.2  | 1.49 | 1.54 |
| 43 | 2020.11.24 | 6:50  | 0     | 0    | 0    | 0   | 1   | 1.5 | 1.1 | 100 | 1033 | -22.1 | 0     | 0    | -2.2 | -2   | 1.95 | 1.99 |
| 44 | 2020.11.24 | 12:00 | 1.541 | 0.31 | 0.7  | 0   | 1   | 2.2 | 1.5 | 99  | 1033 | 74.5  | 132.7 | 15.5 | 7.4  | 6.7  | 1.32 | 1.44 |
| 45 | 2020.11.24 | 15:50 | 0.578 | 0.29 | -0.3 | 0   | 1   | 1.5 | 1.1 | 100 | 1032 | 12    | 46.6  | 2.3  | 0.9  | 0.8  | 1.73 | 1.79 |
| 46 | 2020.11.29 | 7:20  | 0.389 | 0.18 | -1   | 0   | 1   | 1.5 | 1.1 | 99  | 1022 | -7.6  | 19.5  | -1   | -1.7 | -1.7 | 1.93 | 1.97 |
| 47 | 2020.12.01 | 6:40  | 0     | 0    | -1.8 | 0   | 1   | 1.5 | 1.1 | 100 | 1025 | -21.5 | 0     | -1.8 | -3.9 | -3.8 | 2.08 | 2.13 |
| 48 | 2020.12.11 | 7:50  | 0.293 | 0.04 | 3    | 0   | 1   | 1.5 | 1.1 | 100 | 1011 | -20.7 | 3.3   | 2.9  | 1    | 1.2  | 1.72 | 1.76 |
| 49 | 2020.12.16 | 7:10  | 0.293 | 0.04 | 2.5  | 0   | 1   | 1.5 | 1.1 | 100 | 1024 | -20.5 | 3.3   | 2.5  | 0.5  | 0.7  | 1.75 | 1.79 |
| 50 | 2020.12.17 | 7:30  | 0.293 | 0.04 | 2.1  | 0   | 1   | 1.5 | 1.1 | 100 | 1026 | -20.4 | 3.3   | 2.1  | 0.1  | 0.3  | 1.78 | 1.82 |
| 51 | 2020.12.30 | 17:50 | 0     | 0    | 7.2  | 0   | 1   | 1.5 | 1.1 | 100 | 1006 | -24.5 | 0     | 7.1  | 4.9  | 5.1  | 1.43 | 1.46 |
| 52 | 2021.01.10 | 6:30  | 0     | 0    | -4.3 | 0   | 1   | 4.2 | 1.7 | 99  | 1023 | -20.7 | 0     | -4.2 | -6.1 | -5.7 | 2.33 | 2.44 |
| 53 | 2021.01.12 | 6:20  | 0     | 0    | -5.5 | 0   | 1   | 2.8 | 1.9 | 100 | 1019 | -20.4 | 0     | -5.4 | -7.2 | -7   | 2.43 | 2.48 |
| 54 | 2021.02.03 | 7:30  | 0.452 | 0.35 | 0.3  | 0   | 1   | 1.5 | 1.1 | 100 | 1013 | 9.9   | 43.9  | 2.4  | 1.3  | 1.2  | 1.7  | 1.76 |
| 55 | 2021.02.20 | 7:30  | 0.452 | 0.35 | 2.1  | 0   | 1   | 1.5 | 1.1 | 100 | 1025 | 9.3   | 43.9  | 4    | 3    | 2.9  | 1.58 | 1.63 |
| 56 | 2021.02.21 | 7:10  | 0.452 | 0.35 | 1.4  | 0   | 1   | 1.5 | 1.1 | 99  | 1030 | 9.5   | 43.9  | 3.4  | 2.3  | 2.3  | 1.63 | 1.68 |
| 57 | 2021.02.25 | 7:20  | 0.452 | 0.35 | -0.1 | 0.1 | 1   | 1.5 | 1.1 | 100 | 1034 | 16    | 52.1  | 3.3  | 1.5  | 1.3  | 1.69 | 1.75 |
| 58 | 2021.11.03 | 7:30  | 0.389 | 0.18 | 4    | 0   | 1   | 1.1 | 0.8 | 99  | 1012 | -9.2  | 19.5  | 3.9  | 3    | 3.1  | 1.52 | 1.56 |
| 59 | 2021.11.12 | 22:30 | 0     | 0    | 1.9  | 0   | 1   | 1.1 | 0.8 | 98  | 1022 | -22.7 | 0     | 1.9  | -0.5 | -0.3 | 1.77 | 1.81 |
| 60 | 2021.11.13 | 21:37 | 0     | 0    | 4.4  | 0   | 1   | 1.1 | 0.8 | 100 | 1020 | -23.6 | 0     | 4.3  | 1.9  | 2.1  | 1.59 | 1.63 |
| 61 | 2021.11.14 | 7:10  | 0.389 | 0.18 | 4.8  | 0   | 1   | 1.1 | 0.8 | 96  | 1021 | -9.5  | 19.5  | 4.7  | 3.8  | 3.9  | 1.46 | 1.51 |
| 62 | 2021.11.21 | 7:30  | 0.389 | 0.18 | 0.2  | 0   | 1   | 1.1 | 0.8 | 100 | 1016 | -8    | 19.5  | 0.2  | -0.6 | -0.6 | 1.79 | 1.84 |
| 63 | 2021.11.21 | 10:20 | 1.415 | 0.3  | 3    | 0   | 1   | 1.1 | 0.8 | 100 | 1015 | 63    | 117.9 | 15.3 | 9.6  | 9.1  | 1.05 | 1.14 |
| 64 | 2021.11.28 | 7:20  | 0.389 | 0.18 | 4.8  | 0   | 1   | 1.1 | 0.8 | 100 | 997  | -9.5  | 19.5  | 4.7  | 3.8  | 3.9  | 1.46 | 1.51 |
| 65 | 2021.12.14 | 7:10  | 0.293 | 0.04 | -1.7 | 0   | 1   | 1.1 | 0.8 | 98  | 1027 | -19.2 | 3.3   | -1.7 | -3.8 | -3.6 | 2.02 | 2.06 |
| 66 | 2021.12.14 | 20:30 | 0     | 0    | -3   | 0   | 1   | 1.1 | 0.8 | 100 | 1028 | -21.1 | 0     | -2.9 | -5.3 | -5.1 | 2.13 | 2.17 |
| 67 | 2021.12.30 | 8:30  | 0.829 | 0.17 | 2    | 0   | 1   | 1.9 | 1.1 | 100 | 1019 | 5.8   | 39.1  | 3.2  | 2.6  | 2.5  | 1.61 | 1.7  |
| 68 | 2021.12.30 | 22:20 | 0     | 0    | 4    | 0   | 1   | 1.1 | 0.8 | 100 | 1022 | -23.4 | 0     | 3.9  | 1.6  | 1.7  | 1.62 | 1.66 |
| 69 | 2021.12.31 | 6:40  | 0     | 0    | 2    | 0   | 0.5 | 1.1 | 0.8 | 100 | 1023 | -76   | 0     | 1.9  | -6   | -5.4 | 2.16 | 2.17 |
| 70 | 2022.01.02 | 7:50  | 0.293 | 0.04 | 2    | 1   | 0.4 | 1.1 | 0.8 | 100 | 1025 | -24.5 | 81.4  | 1.9  | -0.6 | -0.4 | 1.78 | 1.82 |
| 71 | 2022.09.27 | 6:30  | 0     | 0    | 10   | 0   | 1   | 1.1 | 0.8 | 98  | 1002 | -25.5 | 0     | 9.8  | 7.4  | 7.6  | 1.19 | 1.23 |
| 72 | 2022.10.23 | 7:30  | 0.448 | 0.11 | 6.4  | 0   | 1   | 1.1 | 0.6 | 98  | 1023 | -14.2 | 13.7  | 6.3  | 4.8  | 5    | 1.34 | 1.42 |
| 73 | 2022.10.23 | 10:50 | 0.486 | 0.39 | 10.2 | 0   | 1   | 1.7 | 0.8 | 99  | 1024 | 12.8  | 52.7  | 12.7 | 11.5 | 11.3 | 0.91 | 1.04 |

|     |            |       |       |      |      |     |   |     |     |     |      |       |       |      |      |      |      |      |
|-----|------------|-------|-------|------|------|-----|---|-----|-----|-----|------|-------|-------|------|------|------|------|------|
| 74  | 2022.10.26 | 7:30  | 0.448 | 0.11 | 4.8  | 0   | 1 | 1.7 | 1.1 | 97  | 1022 | -13.7 | 13.7  | 4.7  | 3.5  | 3.6  | 1.54 | 1.6  |
| 75  | 2022.10.27 | 8:15  | 0.586 | 0.35 | 11.5 | 0   | 1 | 1.4 | 0.8 | 99  | 1028 | 15.5  | 57    | 14.4 | 13.1 | 12.8 | 0.8  | 0.9  |
| 76  | 2022.10.28 | 5:15  | 0     | 0    | 11.2 | 0   | 1 | 1.4 | 0.8 | 100 | 1030 | -26   | 0     | 11   | 8.6  | 8.9  | 1.1  | 1.17 |
| 77  | 2022.10.29 | 7:10  | 0.448 | 0.11 | 10.8 | 0   | 1 | 1.1 | 0.3 | 100 | 1028 | -15.8 | 13.7  | 10.6 | 8.8  | 9.3  | 0.94 | 1.1  |
| 78  | 2022.10.29 | 21:40 | 0     | 0    | 12.3 | 0   | 1 | 1.1 | 0.3 | 100 | 1026 | -26.4 | 0     | 12.1 | 9.1  | 9.9  | 0.92 | 1.06 |
| 79  | 2022.10.30 | 22:30 | 0     | 0    | 11.5 | 0   | 1 | 1.4 | 0.8 | 100 | 1024 | -26.1 | 0     | 11.3 | 8.9  | 9.2  | 1.08 | 1.14 |
| 80  | 2022.10.31 | 6:30  | 0.448 | 0.11 | 10.3 | 0   | 1 | 1.7 | 1.1 | 99  | 1024 | -15.6 | 13.7  | 10.1 | 8.8  | 9    | 1.14 | 1.2  |
| 81  | 2022.11.03 | 6:30  | 0     | 0    | 6.2  | 0   | 1 | 1.1 | 0.3 | 98  | 1024 | -24.2 | 0     | 6.1  | 3.1  | 3.9  | 1.35 | 1.5  |
| 82  | 2022.11.08 | 5:30  | 0     | 0    | 3.3  | 0   | 1 | 0.8 | 0.3 | 97  | 1022 | -23.2 | 0     | 3.2  | 0.3  | 0.9  | 1.55 | 1.67 |
| 83  | 2022.11.08 | 9:15  | 1.08  | 0.31 | 5.5  | 0   | 1 | 0.8 | 0.3 | 97  | 1023 | 44    | 93    | 14.1 | 11.1 | 10.1 | 0.79 | 1.02 |
| 84  | 2022.11.08 | 21:30 | 0     | 0    | 9    | 0   | 1 | 2.2 | 0.8 | 97  | 1023 | -25.2 | 0     | 8.8  | 6.4  | 7.1  | 1.26 | 1.38 |
| 85  | 2022.11.09 | 21:50 | 0     | 0    | 9.7  | 0   | 1 | 2.2 | 0.6 | 97  | 1020 | -25.4 | 0     | 9.5  | 6.9  | 7.7  | 1.18 | 1.33 |
| 86  | 2022.11.11 | 7:30  | 0.586 | 0.18 | 5.4  | 0   | 1 | 2.2 | 1.1 | 97  | 1034 | -2.5  | 29.3  | 5.3  | 5.2  | 5.2  | 1.42 | 1.52 |
| 87  | 2022.11.12 | 7:30  | 0.586 | 0.18 | 2.4  | 0   | 1 | 1.1 | 0.8 | 97  | 1033 | -1.5  | 29.3  | 2.4  | 2.2  | 2.3  | 1.58 | 1.63 |
| 88  | 2022.11.13 | 1:30  | 0     | 0    | 3.9  | 0   | 1 | 1.1 | 0.8 | 98  | 1033 | -23.4 | 0     | 3.8  | 1.5  | 1.6  | 1.63 | 1.67 |
| 89  | 2022.11.13 | 6:30  | 0     | 0    | 2.8  | 0   | 1 | 0.5 | 0.3 | 97  | 1033 | -23   | 0     | 2.7  | -0.2 | 0.1  | 1.59 | 1.65 |
| 90  | 2022.11.13 | 8:30  | 0.682 | 0.29 | 4.8  | 0   | 1 | 1.7 | 0.8 | 97  | 1033 | 16.4  | 54.9  | 8.1  | 6.5  | 6.2  | 1.27 | 1.42 |
| 91  | 2022.11.13 | 10:30 | 1.415 | 0.3  | 6.3  | 0   | 1 | 2.5 | 0.3 | 98  | 1032 | 61.9  | 117.9 | 18   | 14.2 | 10.9 | 0.57 | 1.14 |
| 92  | 2022.11.13 | 20:10 | 0     | 0    | 5.1  | 0   | 1 | 1.1 | 0.8 | 97  | 1030 | -23.8 | 0     | 5    | 2.6  | 2.8  | 1.54 | 1.58 |
| 93  | 2022.11.14 | 6:15  | 0     | 0    | 4.8  | 0   | 1 | 1.4 | 0.8 | 97  | 1027 | -23.7 | 0     | 4.7  | 2.3  | 2.7  | 1.56 | 1.63 |
| 94  | 2022.11.14 | 20:15 | 0     | 0    | 4.7  | 0   | 1 | 1.1 | 0.6 | 97  | 1024 | -23.7 | 0     | 4.6  | 2.1  | 2.4  | 1.54 | 1.61 |
| 95  | 2022.11.15 | 20:45 | 0     | 0    | 7.1  | 0   | 1 | 1.7 | 0.8 | 100 | 1013 | -24.5 | 0     | 7    | 4.6  | 5    | 1.4  | 1.49 |
| 96  | 2022.11.16 | 6:30  | 0     | 0    | 7.7  | 0   | 1 | 1.7 | 0.8 | 98  | 1007 | -24.7 | 0     | 7.6  | 5.2  | 5.6  | 1.36 | 1.44 |
| 97  | 2022.11.16 | 9:15  | 1.08  | 0.31 | 8.1  | 0   | 1 | 1.1 | 0.8 | 98  | 1006 | 43.1  | 93    | 16.3 | 12.5 | 12.2 | 0.84 | 0.92 |
| 98  | 2022.11.16 | 10:15 | 1.415 | 0.3  | 8.5  | 0   | 1 | 1.7 | 0.8 | 98  | 1006 | 61.1  | 117.9 | 19.9 | 14.7 | 13.6 | 0.69 | 0.88 |
| 99  | 2022.11.16 | 11:30 | 1.545 | 0.3  | 8.8  | 0   | 1 | 1.9 | 0.8 | 98  | 1005 | 68.9  | 128.8 | 21.5 | 15.8 | 14.4 | 0.61 | 0.85 |
| 100 | 2022.11.16 | 12:15 | 1.541 | 0.31 | 8.9  | 0   | 1 | 1.9 | 0.8 | 98  | 1005 | 71.7  | 132.7 | 22   | 16.2 | 14.7 | 0.58 | 0.82 |
| 101 | 2022.11.16 | 13:40 | 1.357 | 0.3  | 8.8  | 0   | 1 | 1.7 | 0.8 | 98  | 1004 | 57.5  | 113.1 | 19.5 | 14.6 | 13.6 | 0.69 | 0.88 |
| 102 | 2022.11.16 | 14:40 | 0.992 | 0.32 | 8.8  | 0   | 1 | 1.4 | 0.8 | 98  | 1004 | 39.3  | 88.2  | 16.2 | 12.8 | 12.3 | 0.82 | 0.95 |
| 103 | 2022.11.16 | 15:55 | 0.578 | 0.29 | 8.7  | 0   | 1 | 1.9 | 0.6 | 98  | 1003 | 8.9   | 46.6  | 10.4 | 9.7  | 9.4  | 0.99 | 1.19 |
| 104 | 2022.11.16 | 16:40 | 0.205 | 0.22 | 8.6  | 0   | 1 | 1.7 | 0.8 | 98  | 1003 | -15.9 | 12.5  | 8.4  | 7    | 7.3  | 1.23 | 1.32 |
| 105 | 2022.11.16 | 17:10 | 0     | 0    | 8.6  | 0   | 1 | 1.7 | 0.8 | 98  | 1003 | -25   | 0     | 8.4  | 6.1  | 6.5  | 1.29 | 1.38 |
| 106 | 2022.11.21 | 7:50  | 0.389 | 0.18 | -1.6 | 0   | 1 | 1.9 | 0.8 | 97  | 1010 | -7.4  | 19.5  | -1.6 | -2.4 | -2.2 | 1.92 | 2.06 |
| 107 | 2022.11.21 | 22:30 | 0     | 0    | 0.1  | 0   | 1 | 2.8 | 1.4 | 98  | 1009 | -22.1 | 0     | 0.1  | -1.9 | -1.5 | 1.98 | 2.06 |
| 108 | 2022.11.26 | 6:30  | 0     | 0    | 2    | 0   | 1 | 1.9 | 1.1 | 98  | 1026 | -22.8 | 0     | 2    | -0.2 | 0.1  | 1.81 | 1.87 |
| 109 | 2022.11.26 | 9:30  | 1.08  | 0.31 | 2.3  | 0   | 1 | 1.7 | 1.1 | 98  | 1028 | 45    | 93    | 11.3 | 6.7  | 6.2  | 1.32 | 1.42 |
| 110 | 2022.11.27 | 7:30  | 0.389 | 0.18 | 3.2  | 0   | 1 | 1.9 | 1.4 | 98  | 1030 | -9    | 19.5  | 3.1  | 2.4  | 2.5  | 1.66 | 1.7  |
| 111 | 2022.12.07 | 6:30  | 0     | 0    | 0.3  | 0   | 1 | 1.1 | 0.8 | 98  | 1016 | -22.2 | 0     | 0.3  | -2.1 | -1.9 | 1.89 | 1.93 |
| 112 | 2022.12.23 | 8:30  | 0.829 | 0.17 | 2.4  | 0   | 1 | 1.4 | 0.8 | 98  | 1013 | 5.7   | 39.1  | 3.6  | 3    | 2.9  | 1.52 | 1.62 |
| 113 | 2022.12.23 | 10:25 | 1.369 | 0.3  | 2.4  | 0   | 1 | 1.9 | 1.1 | 98  | 1013 | 60.4  | 114.1 | 14.3 | 8.3  | 7.4  | 1.2  | 1.35 |
| 114 | 2022.12.23 | 12:40 | 1.285 | 0.37 | 3.7  | 0   | 1 | 1.9 | 0.8 | 98  | 1012 | 73.1  | 132.1 | 17.8 | 11.4 | 9.7  | 0.93 | 1.19 |
| 115 | 2022.12.23 | 16:00 | 0.318 | 0.05 | 4.6  | 0   | 1 | 0.8 | 0.3 | 98  | 1013 | -20.4 | 4.4   | 4.5  | 2    | 2.5  | 1.43 | 1.55 |
| 116 | 2022.12.23 | 17:20 | 0     | 0    | 4.4  | 0   | 1 | 0.8 | 0.3 | 98  | 1013 | -23.6 | 0     | 4.3  | 1.4  | 1.9  | 1.47 | 1.59 |
| 117 | 2022.12.23 | 20:10 | 0     | 0    | 3.7  | 0   | 1 | 1.4 | 0.3 | 98  | 1012 | -23.3 | 0     | 3.6  | 0.7  | 1.6  | 1.52 | 1.71 |
| 118 | 2022.12.23 | 22:10 | 0     | 0    | 3.3  | 0   | 1 | 1.1 | 0.3 | 98  | 1012 | -23.2 | 0     | 3.2  | 0.3  | 1.1  | 1.55 | 1.71 |
| 119 | 2022.12.26 | 9:20  | 1.047 | 0.28 | 5.2  | 0.1 | 1 | 0.8 | 0.3 | 98  | 1022 | 50.9  | 102.4 | 15.1 | 11.7 | 10.5 | 0.74 | 0.99 |
| 120 | 2022.12.30 | 22:50 | 0     | 0    | 4    | 0   | 1 | 3.9 | 2.2 | 99  | 1024 | -23.4 | 0     | 3.9  | 2.2  | 2.5  | 1.74 | 1.81 |
| 121 | 2022.12.31 | 7:30  | 0.293 | 0.04 | 3.9  | 0   | 1 | 1.1 | 0.8 | 98  | 1026 | -21   | 3.3   | 3.8  | 1.7  | 1.9  | 1.61 | 1.65 |
| 122 | 2023.01.01 | 2:10  | 0     | 0    | 4.6  | 0   | 1 | 1.4 | 0.8 | 98  | 1027 | -23.6 | 0     | 4.5  | 2.1  | 2.5  | 1.58 | 1.65 |
| 123 | 2023.01.02 | 8:10  | 0.498 | 0.39 | 5.3  | 0   | 1 | 3.3 | 1.7 | 98  | 1027 | 15.5  | 53.9  | 8.4  | 6.6  | 6.4  | 1.38 | 1.5  |
| 124 | 2023.01.02 | 9:20  | 0.938 | 0.42 | 5.5  | 0   | 1 | 3.3 | 1.8 | 98  | 1027 | 56    | 109.4 | 16.3 | 10.2 | 9.3  | 1.14 | 1.29 |
| 125 | 2023.01.02 | 11:50 | 1.503 | 0.42 | 6.4  | 0   | 1 | 3   | 1.4 | 98  | 1027 | 103.8 | 175.3 | 25.3 | 15.6 | 13.7 | 0.71 | 0.97 |
| 126 | 2023.01.02 | 12:50 | 1.39  | 0.47 | 6.9  | 0   | 1 | 2.5 | 1.4 | 98  | 1026 | 108.1 | 181.5 | 26.4 | 16.5 | 15   | 0.65 | 0.85 |
| 127 | 2023.01.02 | 19:20 | 0     | 0    | 6.7  | 0   | 1 | 2.2 | 1.1 | 98  | 1025 | -24.3 | 0     | 6.6  | 4.4  | 4.8  | 1.47 | 1.55 |
| 128 | 2023.01.02 | 22:20 | 0     | 0    | 6.2  | 0   | 1 | 0.8 | 0.3 | 98  | 1025 | -24.2 | 0     | 6.1  | 3.1  | 3.7  | 1.35 | 1.46 |

|     |            |       |       |      |     |   |   |     |     |     |      |       |       |      |      |      |      |      |
|-----|------------|-------|-------|------|-----|---|---|-----|-----|-----|------|-------|-------|------|------|------|------|------|
| 129 | 2023.01.04 | 9:25  | 0.938 | 0.42 | 2.9 | 0 | 1 | 1.9 | 1.1 | 98  | 1031 | 56.8  | 109.4 | 14.1 | 8.4  | 7.6  | 1.19 | 1.34 |
| 130 | 2023.01.04 | 10:30 | 1.34  | 0.43 | 3.4 | 0 | 1 | 3.9 | 2.5 | 100 | 1031 | 93.6  | 160.1 | 21.1 | 10.5 | 9.5  | 1.17 | 1.31 |
| 131 | 2023.01.14 | 6:50  | 0     | 0    | 2.3 | 0 | 1 | 1.4 | 0.8 | 98  | 1022 | -22.9 | 0     | 2.3  | -0.1 | 0.2  | 1.74 | 1.82 |
| 132 | 2023.02.16 | 7:30  | 0.452 | 0.35 | -5  | 0 | 1 | 0.8 | 0.3 | 98  | 1029 | 11.6  | 43.9  | -2.4 | -3.4 | -3.7 | 1.82 | 2.02 |
| 133 | 2023.10.11 | 6:30  | 0     | 0    | 10  | 0 | 1 | 0.8 | 0.3 | 99  | 1024 | -25.5 | 0     | 9.8  | 6.8  | 7.4  | 1.08 | 1.19 |
| 134 | 2023.10.28 | 7:30  | 0.448 | 0.11 | 9   | 0 | 1 | 1.1 | 0.3 | 99  | 1005 | -15.2 | 13.7  | 8.8  | 7.1  | 7.6  | 1.06 | 1.23 |
| 135 | 2023.12.10 | 20:50 | 0     | 0    | -1  | 0 | 1 | 1.4 | 0.6 | 100 | 1018 | -21.8 | 0     | -1   | -3.5 | -3   | 1.94 | 2.06 |
| 136 | 2023.12.19 | 6:50  | 0     | 0    | -2  | 0 | 1 | 2.2 | 1.4 | 99  | 1030 | -21.5 | 0     | -2   | -4   | -3.7 | 2.13 | 2.19 |
| 137 | 2023.12.19 | 11:00 | 1.344 | 0.35 | -1  | 0 | 1 | 1.9 | 1.1 | 100 | 1029 | 73.6  | 130.7 | 13.8 | 6.3  | 5.2  | 1.35 | 1.52 |
| 138 | 2023.12.19 | 20:30 | 0     | 0    | -1  | 0 | 1 | 1.7 | 1.1 | 100 | 1023 | -21.8 | 0     | -1   | -3.1 | -2.9 | 2.03 | 2.08 |
| 139 | 2023.12.20 | 6:30  | 0     | 0    | -2  | 0 | 1 | 2.2 | 0.8 | 100 | 1015 | -21.5 | 0     | -2   | -4.3 | -3.7 | 2.06 | 2.19 |
| 140 | 2023.12.20 | 10:00 | 1.369 | 0.3  | -2  | 0 | 1 | 2.2 | 1.7 | 99  | 1016 | 61.8  | 114.1 | 10.7 | 3.4  | 3    | 1.63 | 1.71 |
| 141 | 2023.12.29 | 7:30  | 0.293 | 0.04 | -1  | 0 | 1 | 1.1 | 0.8 | 100 | 1021 | -19.4 | 3.3   | -1   | -3.1 | -2.9 | 1.96 | 2.01 |
| 142 | 2023.12.30 | 7:10  | 0.293 | 0.04 | -1  | 0 | 1 | 0.8 | 0.3 | 100 | 1019 | -19.4 | 3.3   | -1   | -3.6 | -3.1 | 1.83 | 1.96 |
| 143 | 2023.12.31 | 7:30  | 0.293 | 0.04 | -2  | 0 | 1 | 1.7 | 0.3 | 100 | 1018 | -19.1 | 3.3   | -2.0 | -4.6 | -3.7 | 1.9  | 2.14 |
| 144 | 2023.12.31 | 10:00 | 1.369 | 0.3  | 1   | 0 | 1 | 1.7 | 0.6 | 100 | 1019 | 60.9  | 114.1 | 13.2 | 7.9  | 6.3  | 1.12 | 1.42 |
| 145 | 2024.01.02 | 6:40  | 0     | 0    | 1   | 0 | 1 | 3   | 1.4 | 100 | 1016 | -22.4 | 0     | 1    | -1   | -0.6 | 1.91 | 2    |
| 146 | 2024.01.02 | 10:10 | 1.34  | 0.43 | 1   | 0 | 1 | 3.9 | 2.2 | 100 | 1015 | 94.4  | 160.1 | 19.3 | 8.5  | 7.2  | 1.3  | 1.48 |
